# Supplementary material
Source: PubMed Central journal article supplement (PMC4186767)
Supplement: Supp_Fig1.pdf [file Supp_Fig1.pdf]

## Supplementary Data

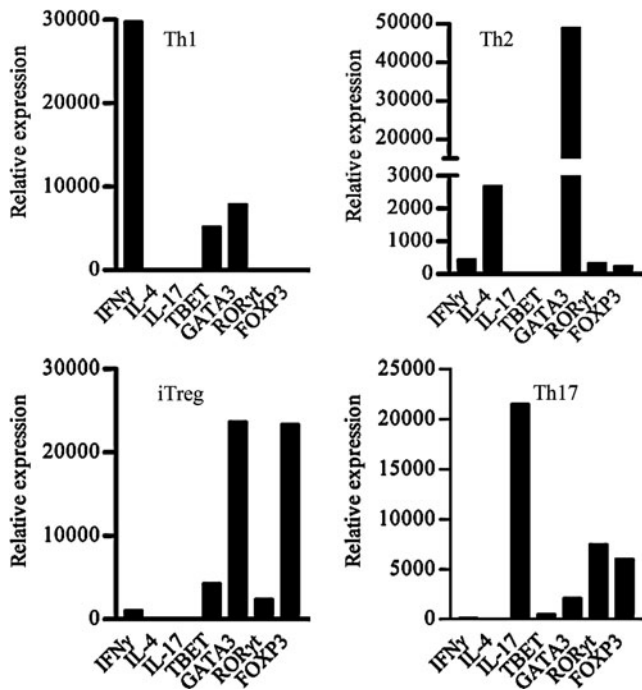

**SUPPLEMENTARY FIG. S1.** Successful polarization of *in vitro*-derived Th cell subsets. Transcription factors (Tbet, Gata3, Ror $\gamma$ t, and FoxP3) and cytokines (IFN- $\gamma$ , IL-4, and IL-17) were measured by quantitative real-time polymerase chain reaction in the cells corresponding to the experiments shown in Fig. 3A. Shown are the means of 6 independent experiments, indicating that the correct polarization was achieved. Th, T helper.
